# Supplementary figures and images for: Spatially resolved shear distribution in microfluidic chip for studying force transduction mechanisms in cells
Source: Royal Society of Chemistry journal article supplement (doi:10.1039/b914874d), 2009-11-17

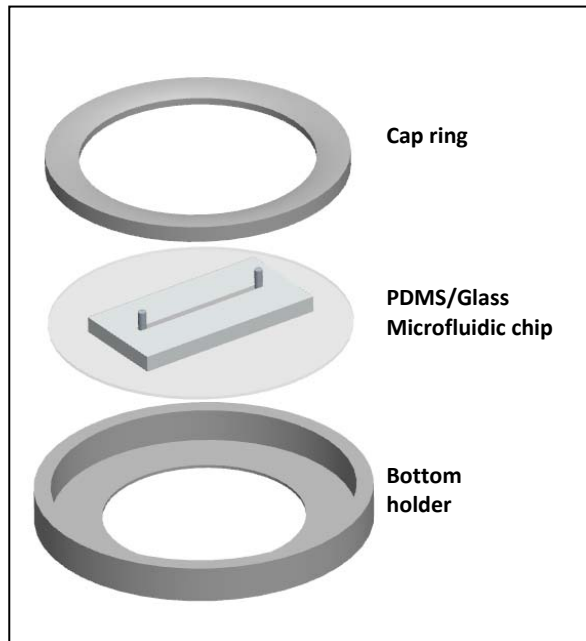

**SI-1.** Device assembly for optical/fluorescence microscopy.

**SI-1.** Wang, et. al.

Supplement: b914874ds1.pdf [file b914874ds1.pdf]
